# Supplementary material
Source: PubMed Central journal article supplement (PMC4880044)

# FIGURE S1

A

Brinkley Buffer

80 mM Pipes pH 6.8  
1 mM MgCl<sub>2</sub>  
50 mM KCl  
1 mM EGTA

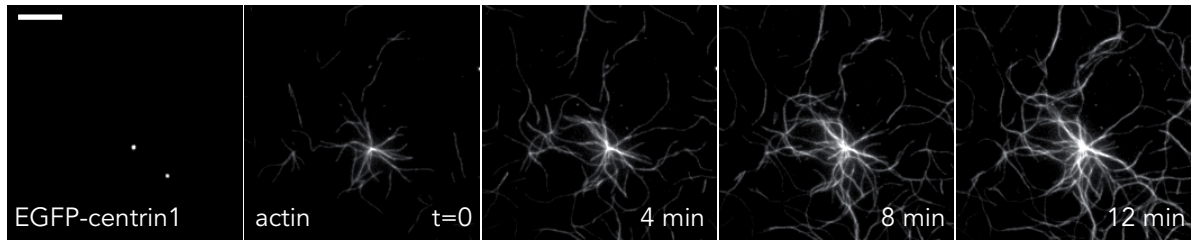

B

TicTac Buffer

10 mM Hepes pH 6.8  
16 mM Pipes  
5 mM MgCl<sub>2</sub>  
50 mM KCl  
1 mM EGTA

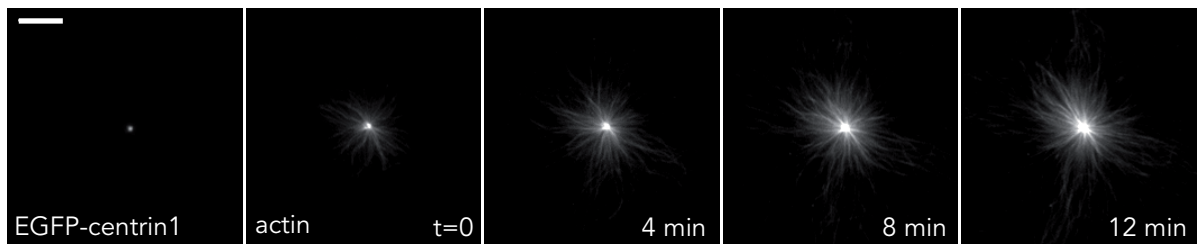

C

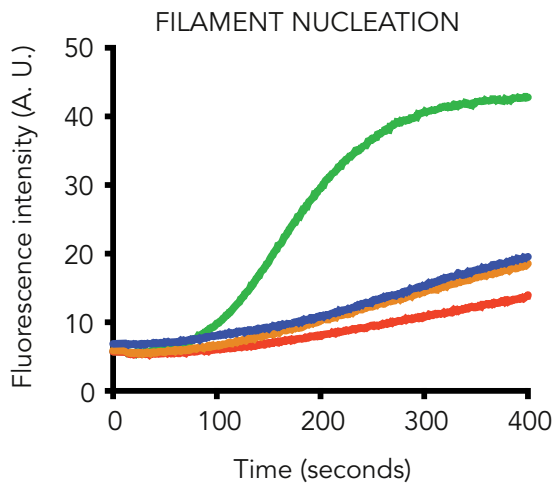

D

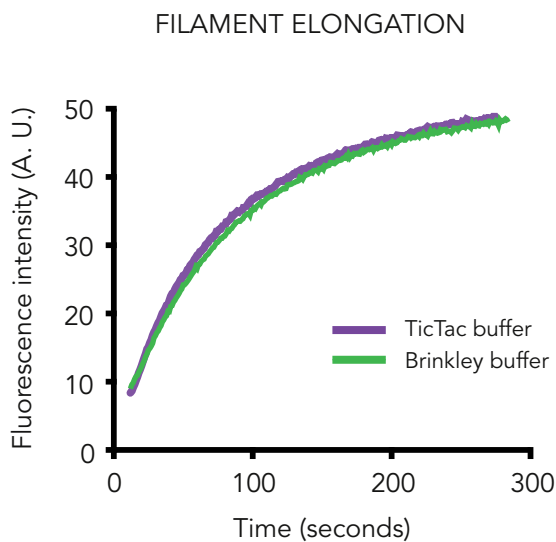

E

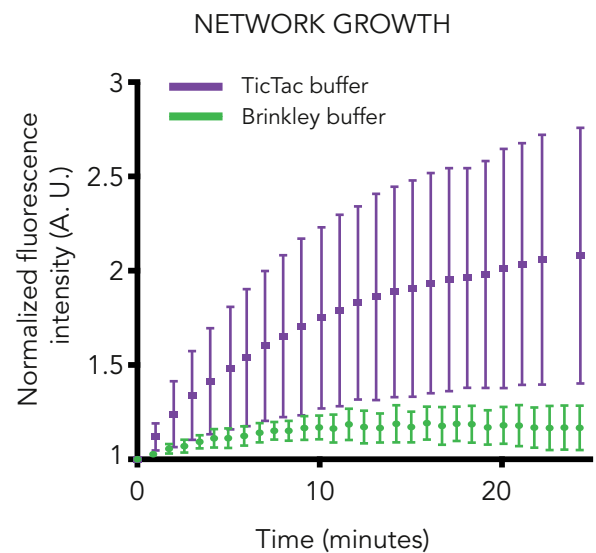

Supplement: NIHMS65991-supplement-Figure_S1.pdf [file NIHMS65991-supplement-Figure_S1.pdf]
