# Supplementary material
Source: PubMed Central journal article supplement (PMC4880044)
Supplement: NIHMS65991-supplement-Figure_S5.pdf [file NIHMS65991-supplement-Figure_S5.pdf]

# FIGURE S5

## A

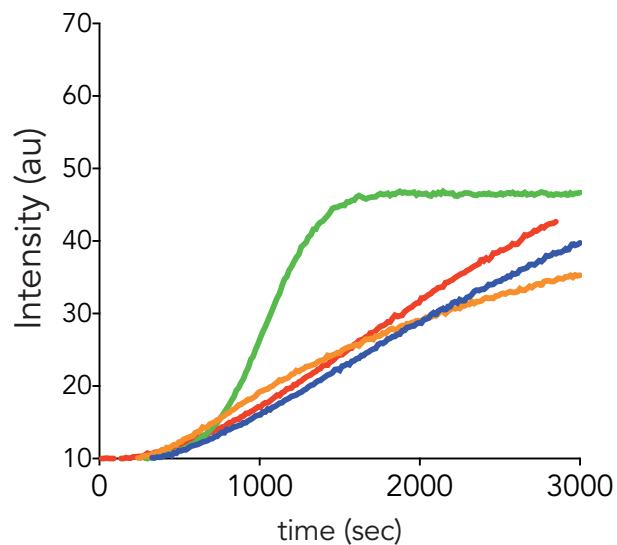

- actin 2 μM (DMSO)
- actin 2 μM + Arp2/3 50 nM (DMSO)
- actin 2 μM + Arp2/3 50 nM + pWA 500 nM (DMSO)
- actin 2 μM + Arp2/3 50 nM + pWA 500 nM (CK666 60 μM)

## B

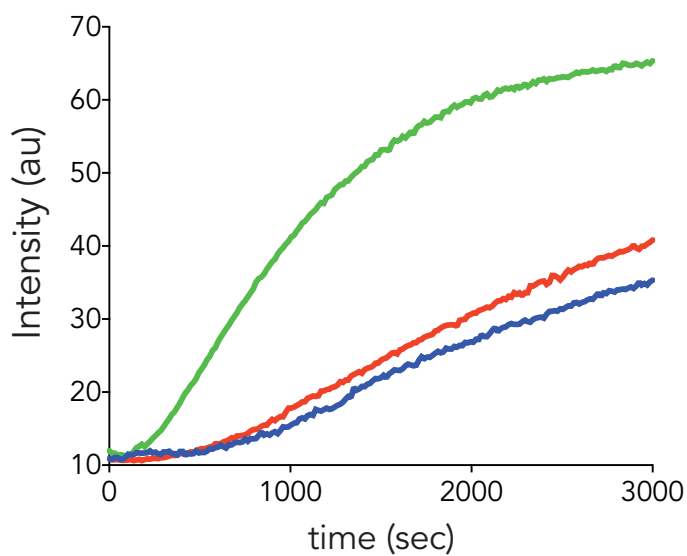

- actin 2 μM (DMSO)
- actin 2 μM + mDia1 1 nM (DMSO)
- actin 2 μM + mDia1 1 nM (SMIFH2 200 μM)
