# Supplementary material
Source: PubMed Central journal article supplement (PMC4880044)

FIGURE S2

A

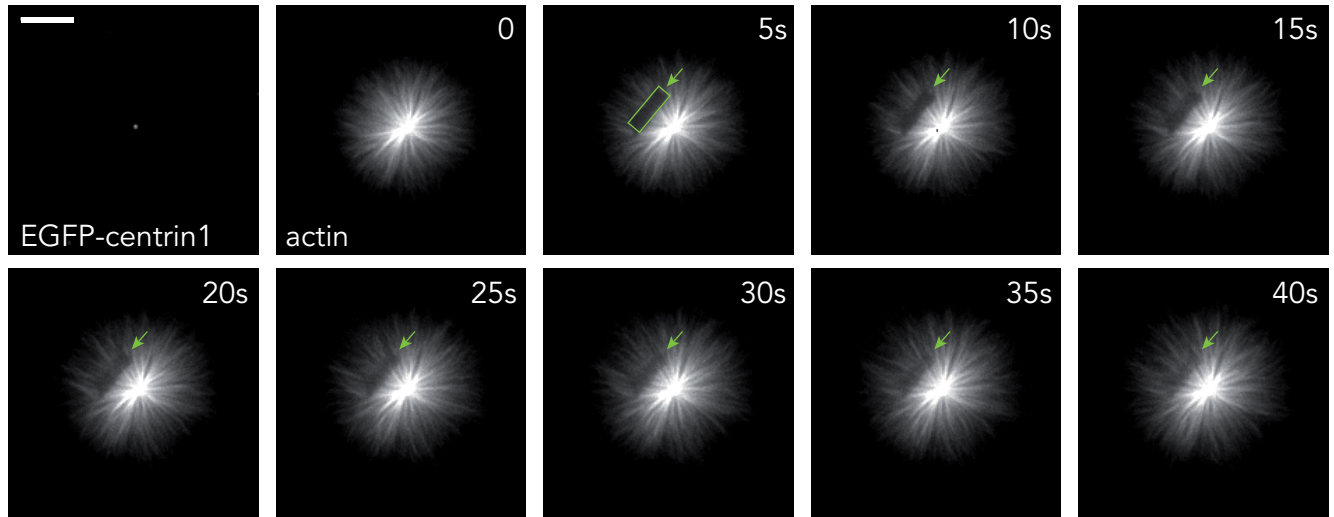

B

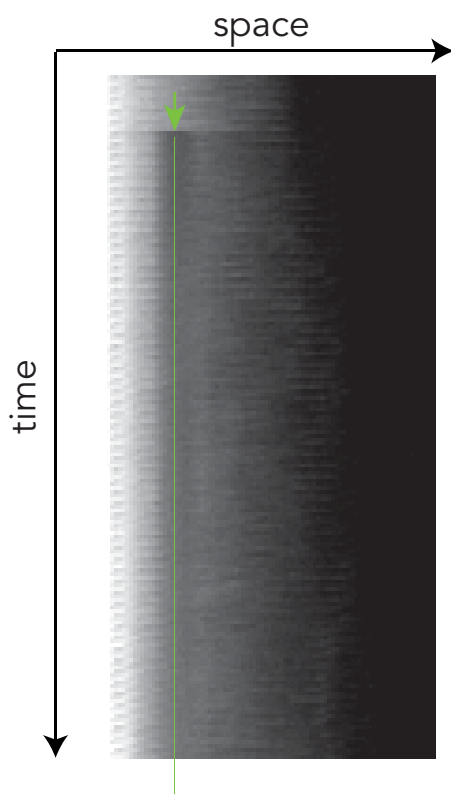

C

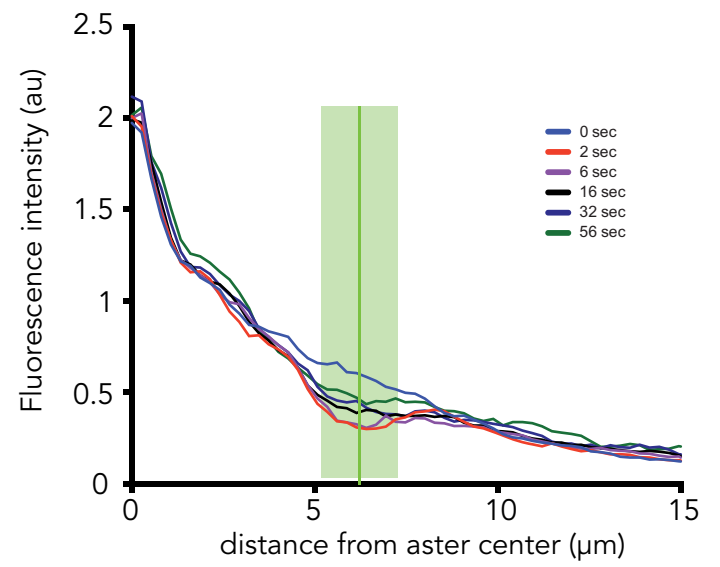

Supplement: NIHMS65991-supplement-Figure_S2.pdf [file NIHMS65991-supplement-Figure_S2.pdf]

# FIGURE S3

## A isolated centrosomes

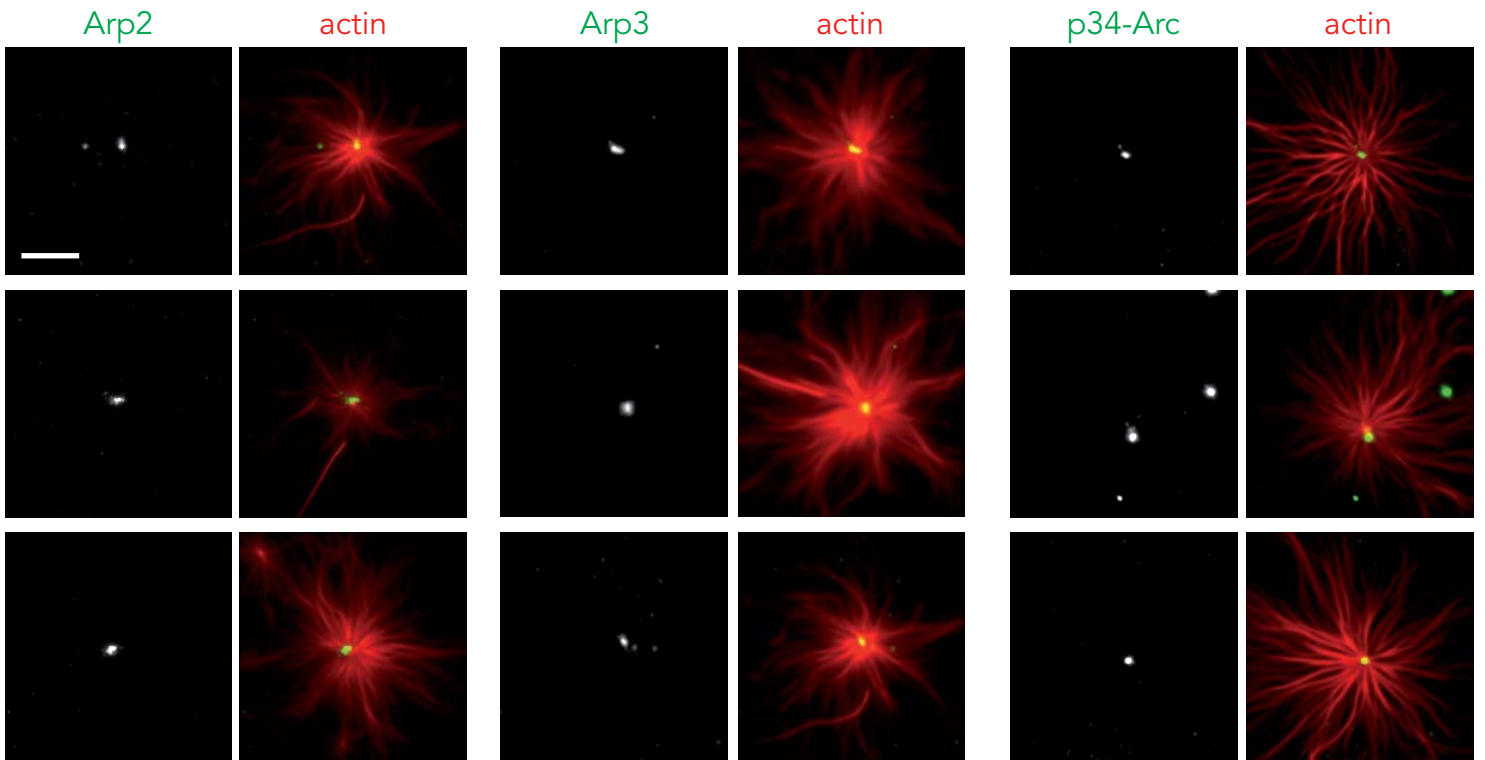

## B

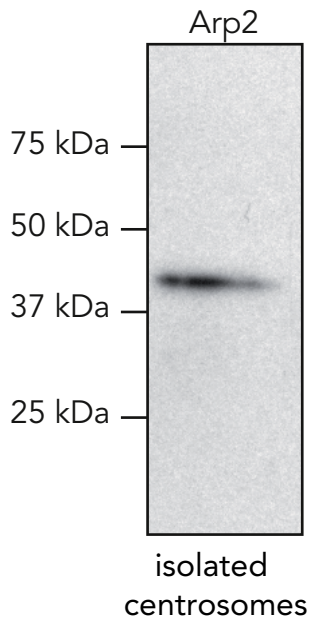

## C

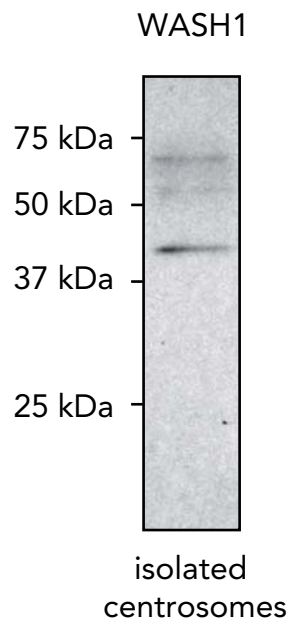

## D

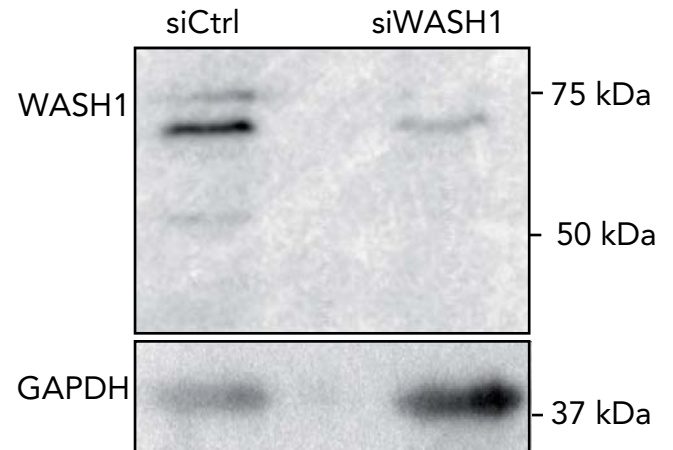

Supplement: NIHMS65991-supplement-Figure_S3.pdf [file NIHMS65991-supplement-Figure_S3.pdf]

# FIGURE S4

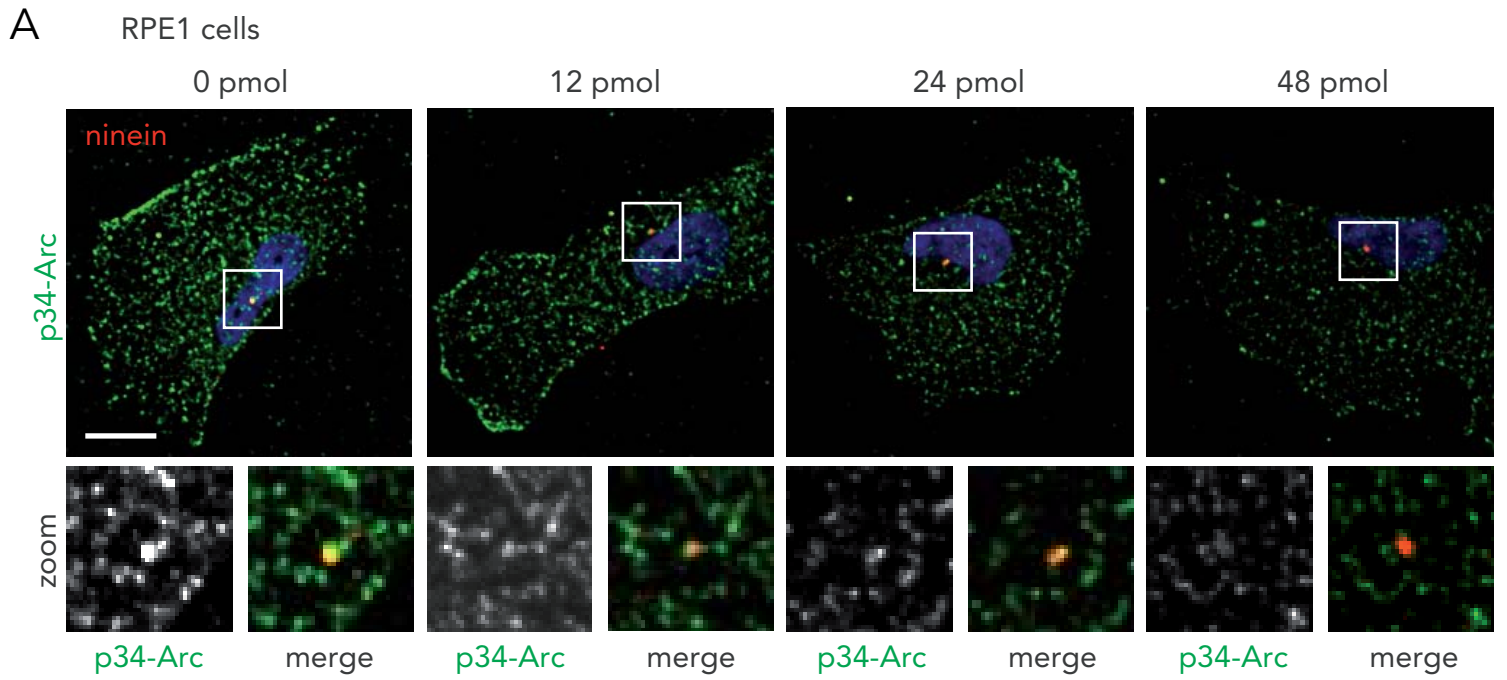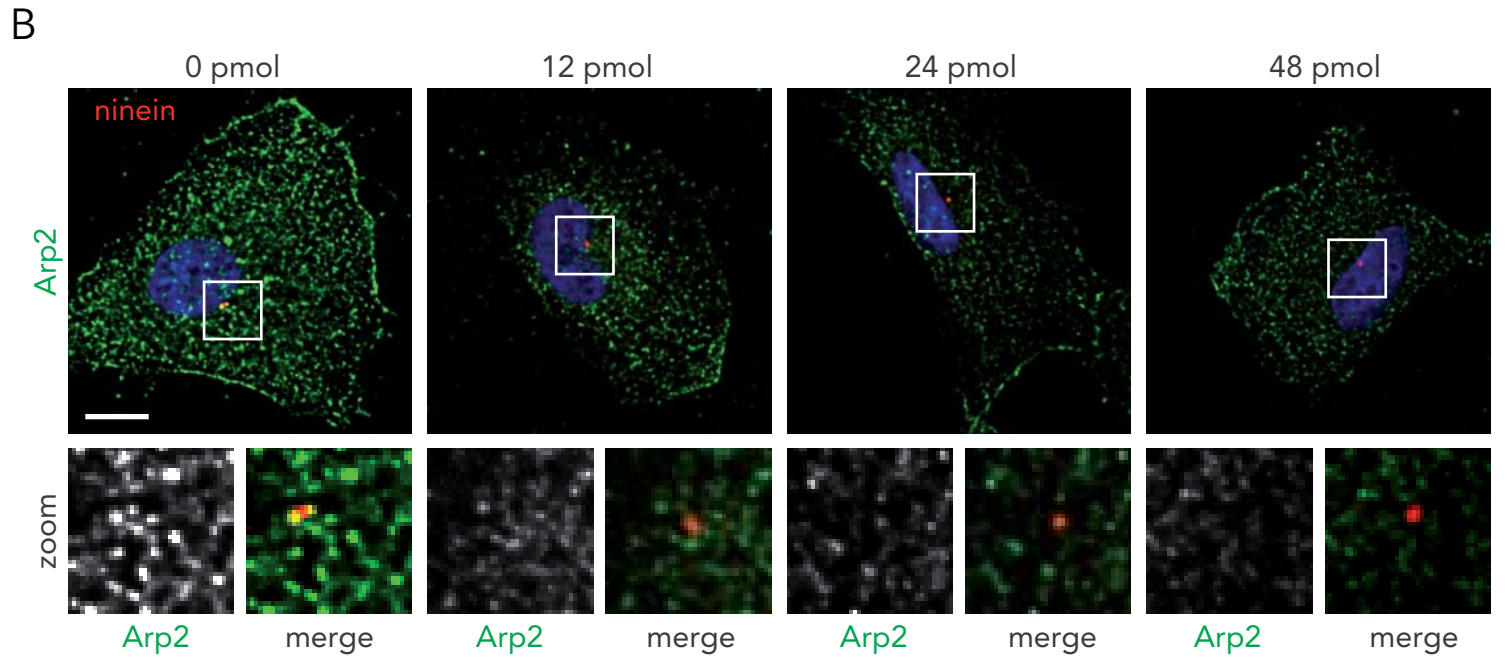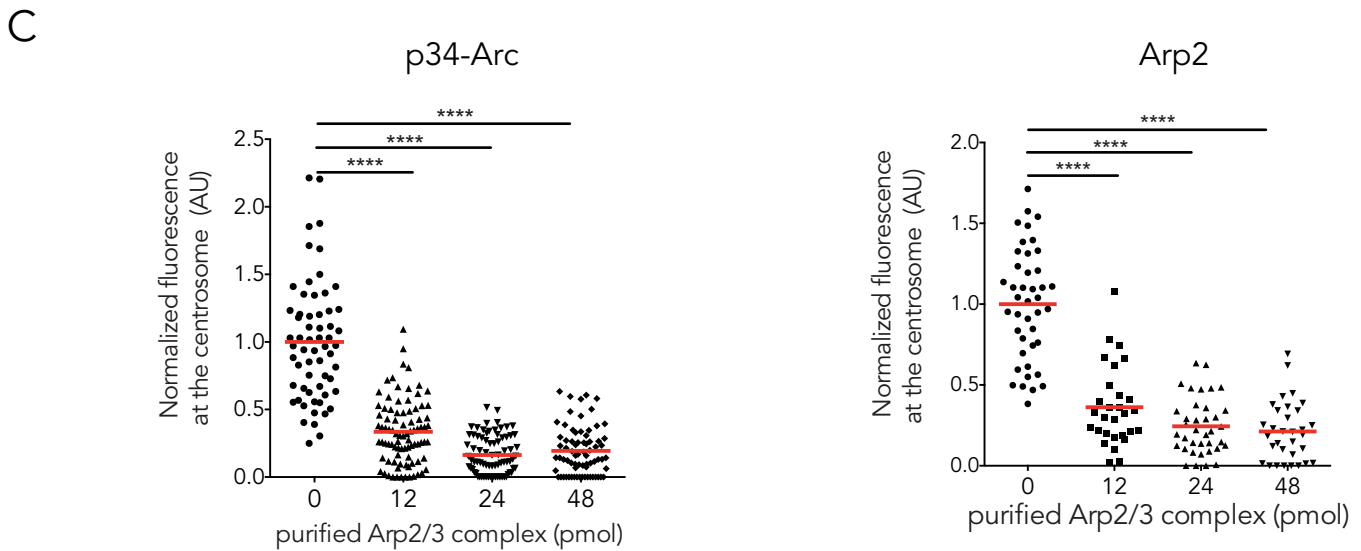

Supplement: NIHMS65991-supplement-Figure_S4.pdf [file NIHMS65991-supplement-Figure_S4.pdf]

# FIGURE S6

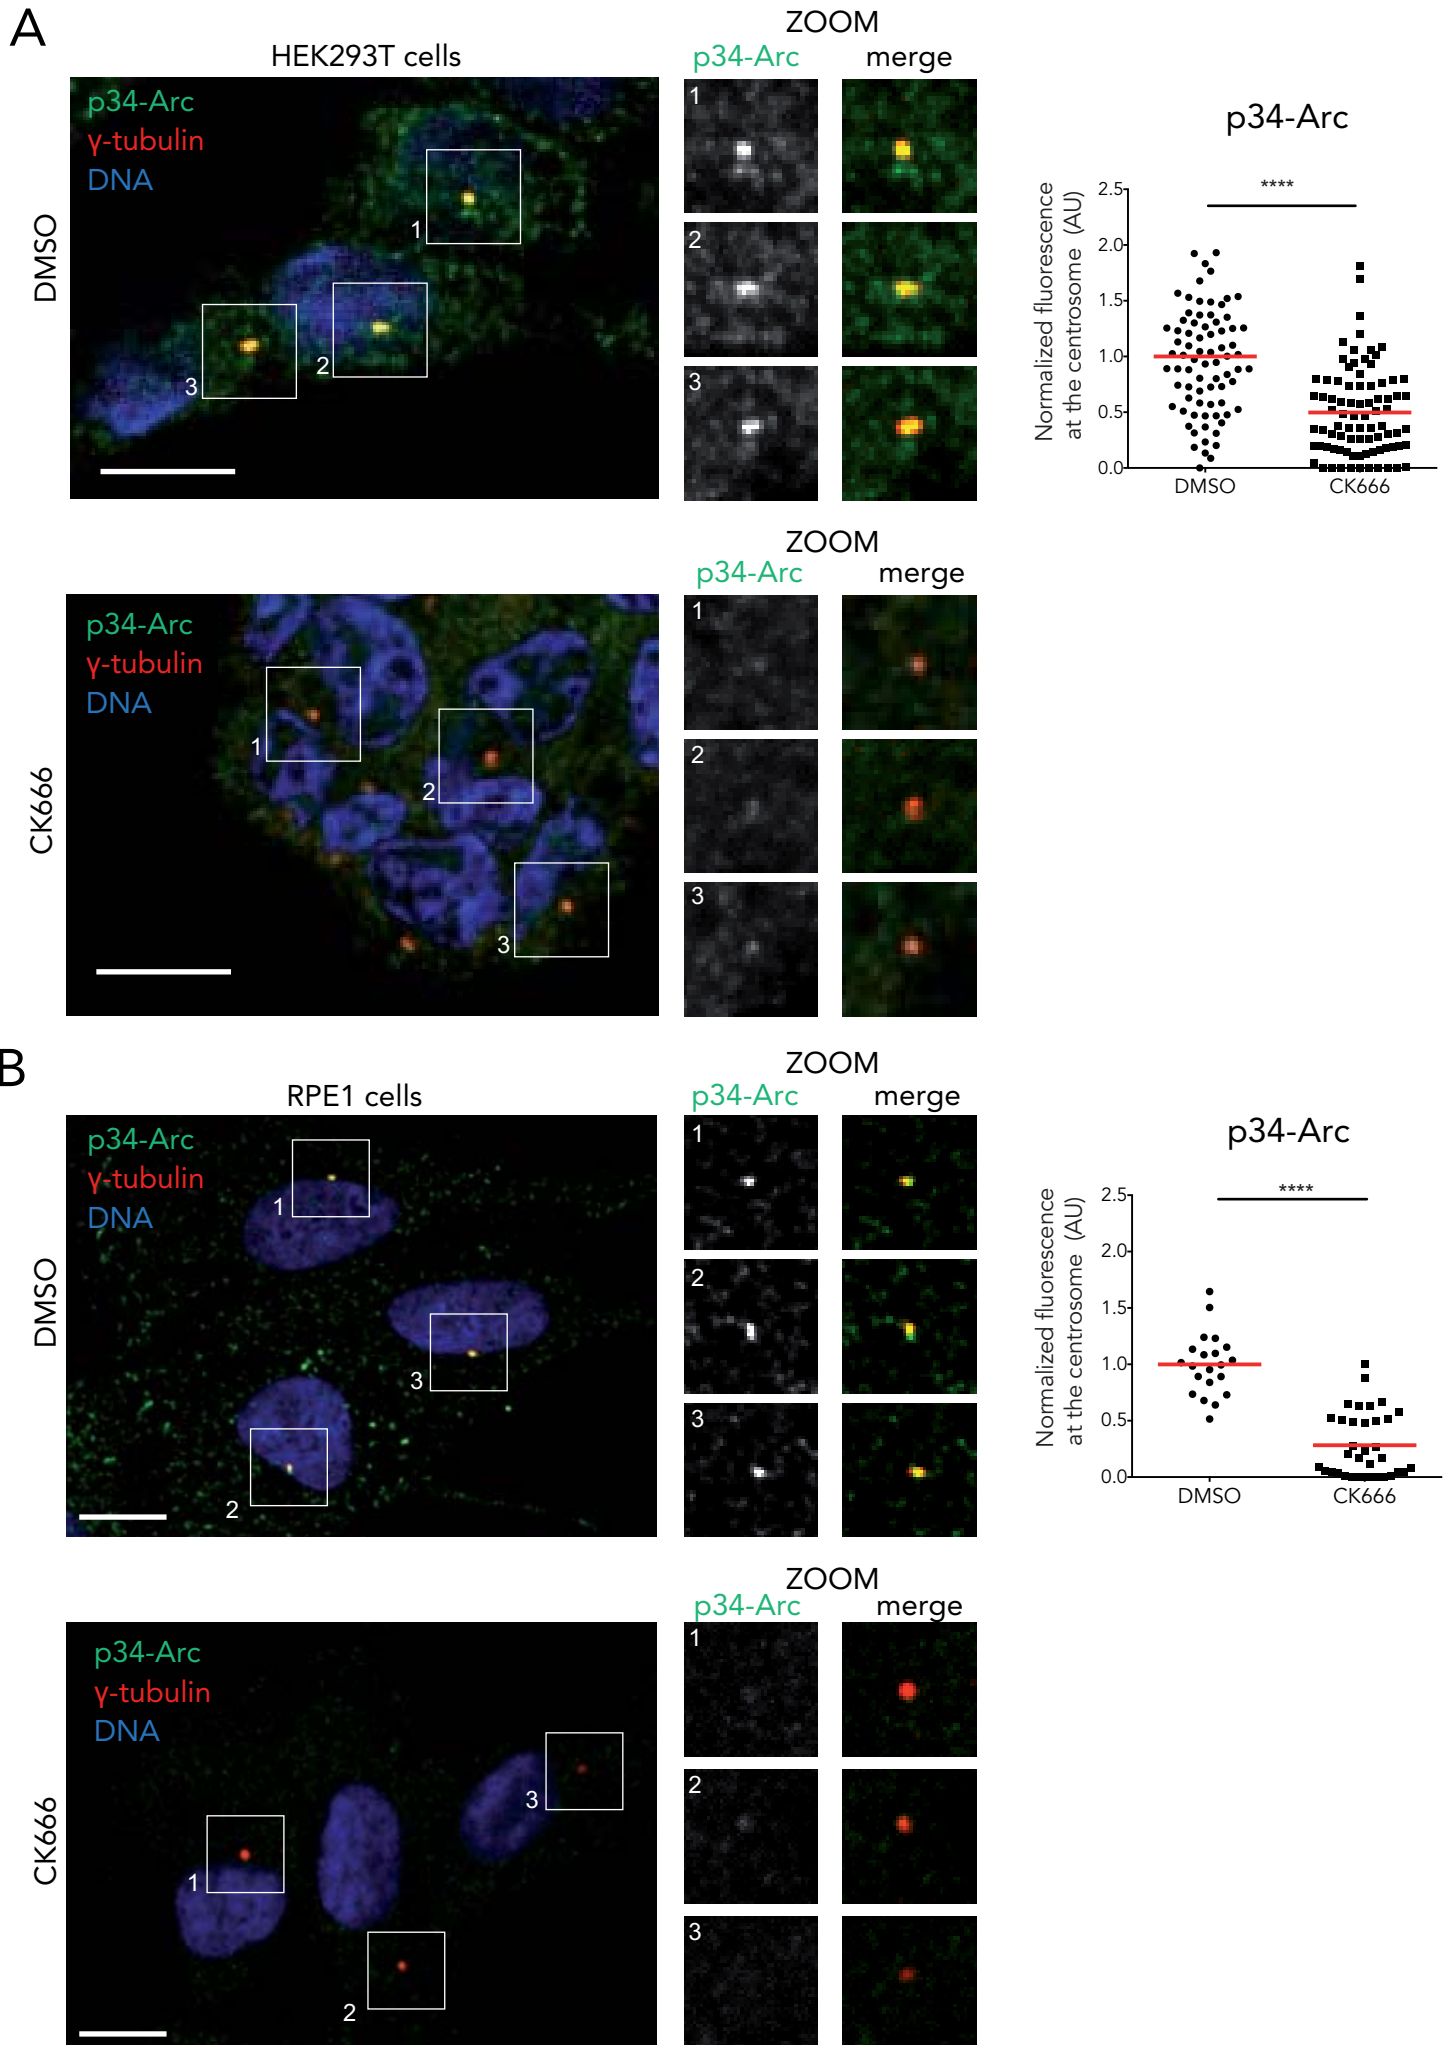

Supplement: NIHMS65991-supplement-Figure_S6.pdf [file NIHMS65991-supplement-Figure_S6.pdf]

# FIGURE S7

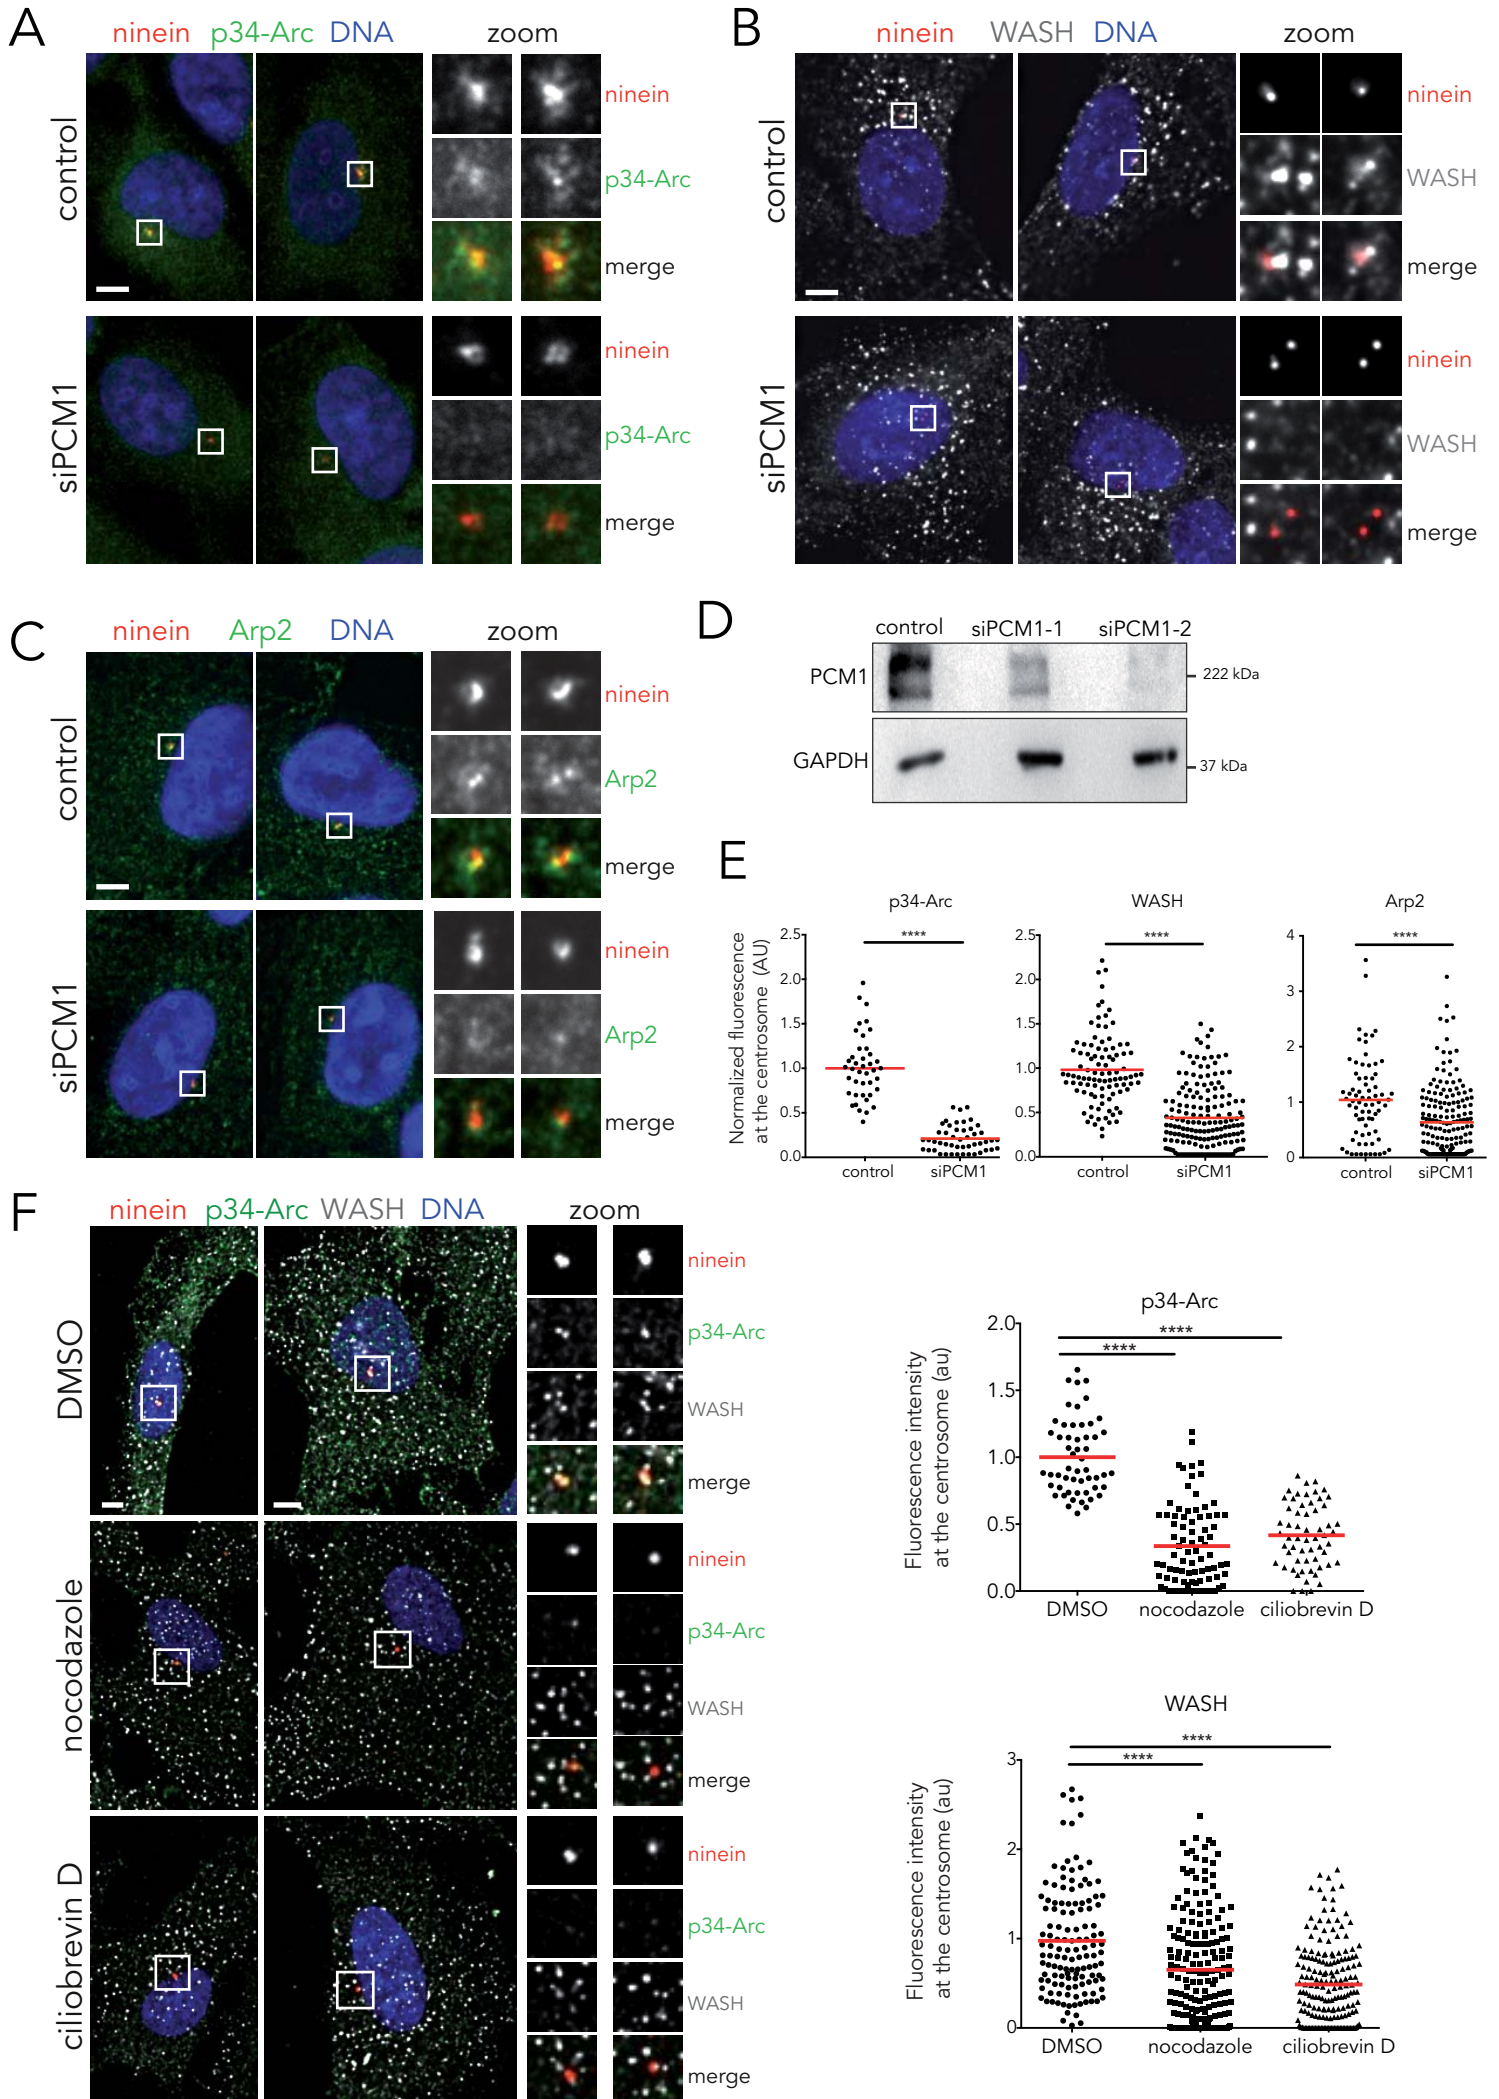

Supplement: NIHMS65991-supplement-Figure_S7.pdf [file NIHMS65991-supplement-Figure_S7.pdf]
